# Supplementary material for: Chitin Synthases from Saprolegnia Are Involved in Tip Growth and Represent a Potential Target for Anti-Oomycete Drugs
Source: PLoS Pathog. 2010 Aug 26;6(8):e1001070. doi: 10.1371/journal.ppat.1001070 (PMC2928807; doi:10.1371/journal.ppat.1001070)
Supplement: Figure S2 — Alignment of the amino acid sequences of SmCHS1 and SmCHS2 with the Neurospora crassa and Saccharamyces cerevisiae CHS2 sequences. The CHS conserved motifs a to h are boxed. The amino acid sequence of the MIT domain (pfam 04212) is boxed and highlighted in yellow. Ser, Thr and Tyr residues that are potentially phosphorylated are shown in bold font and underlined. Potential N-glycosylation sites were identified in SmCHS1 only. They are highlighted in blue colour and bold font. Asterisks indicate residues that are identical in all sequences analysed, colons indicate conserved substitutions between the sequences and periods indicate semi-conserved substitutions. (0.09 MB PDF) [file ppat.1001070.s004.pdf]

S.monoicaChs1 -MPPKRPTT DGRRAYNA-----GNTTVRAPTKR--TQPRGKIGSRASNPNPSAASM 47  
S.monoicaChs2 -MSDQLDLAARLRALRE-----GNAAPADPEAPPPTQPAPAPQYHPQRLPPLYTQ 49  
N.crassaChs2 -MDPRMHTAPPAGHP-----IQPGYQLEDNPYHHQQGFD-IPAG 37  
S.cerevisiaeChs2 MTRNPFMVPEPSNGSPNRRGASNLSKFYANANSNSRWANPSEESLEDSYDQSNVFGQLPAS 60  
: : :

S.monoicaChs1 QAYEFEYDYN-----AMMPMLQ-----PPKSQPTFLNNIA-PISS 82  
S.monoicaChs2 ESLEFGGTYATGSPVGAAEAGSYSQVPVWKDSEKTRRSYLDDEPTPQPQSLINMANTLVQ 109  
N.crassaChs2 PG----RYSFG-----DALHIQTTPQ-----IEGMGGYNAPGQHYTP 70  
S.cerevisiaeChs2 PSRAALRYSPPRRHRTQFYRDSAHNSPVPANRYAANLQESPKRAGEAVIHLSEGSNLYPR 120  
. . .

#### MIT domain pfam 04212

S.monoicaChs1 KEASMKSS-----NAMQLLLQSTSE TIDDAFRAIERAIQAENEGRYREALKHF 130  
S.monoicaChs2 RQASNQSFRRQHTANFRPLPNVEELLDGTP- T YEGAFRLVQLAVQMEQDGDPGAAINLY 168  
N.crassaChs2 DYAVNP EE-HHDAYYNQPYEPQVG-----HDPYAAAPTTPVAG--YQAHDDQRPMLMH 120  
S.cerevisiaeChs2 DNADLPVDPHYLSPPQQPSNNLFGSGRLYSQSSKYTMSTTSTTAPSLAEADDEKEKYLTS 180  
\* . \*

S.monoicaChs1 LDGGEMIVTAAEKEASQKVRNLLHKGKEVLEWAEHLAEWIERYNTHSAPVRVAKPMAVE 190  
S.monoicaChs2 VDAGTTLVEVGKREVDPLLQKGKQKAFELLQRAEELGTWMTVAEEARKAALPQLKIA 228  
N.crassaChs2 TDSQVGQS-----DPYHD---EPQPPTNNAPIKRWKTVKQVLLYRGN-----LVLD 163  
S.cerevisiaeChs2 TTSYDDQSTIFSADTFNETKFELNHPTRQQYVRRANSESKRRMVSDLPPSPKKKALLKLD 240  
. : : : :

S.monoicaChs1 VT YDRMTN-----SPDLDETEARTMFYTPVCCT-PQAF TETGYRLQCIQSG--RRPRL 240  
S.monoicaChs2 RTNVPTVEQAWKGRTPPFHDADEFRLMRYTAVATKDPIQFSNDGYVLRVHQLH--RRIKV 286  
N.crassaChs2 CPIP KLLN-----QLPHGERDEFTHMRYSAATCD-PSEFYEENFTLRQKLF SKPRHTEL 217  
S.cerevisiaeChs2 NPIP KLLD-----TLPRRNSPEFTEMRYTACTVE-PDDFLREGYTLRFAEMN--RECQI 292  
. : \* : \* \* \* : . \* \* . : : \* : \* . : :

a

b

S.monoicaChs1 MVVITMYNE DENELRS TLRKVCNNVLYLKQOSLPGYEGDDAWKQVLVVI SDGR TKANKG 300  
S.monoicaChs2 FITITMYNE EGSEILGTLTGLAKGLGYMCKE-----YGQDFWQEVAVAI SDGR TKASKT 341  
N.crassaChs2 FIVITMYNE DEILFARTMIGVFKNIEYMCKRTESTKTWGKDAWKIVVCV SDGR AKINPR 277  
S.cerevisiaeChs2 AICITMYNE DKYSLARTIHSIMKNVAHLCKREKSHVWGPNGWKKVSVILT SDGR AKVNQG 352  
: : \*\*\*\*\* : \* : : : : : : \* : \* : : \* : : \*\*\*\*\* :

S.monoicaChs1 TLEWLSNVGLYDEEDVMNITSTGVKVQCHLFEHSLQM-----TKENSIR--FPPLQVTFAL 353  
S.monoicaChs2 CLEYLNLGLGAFDEEIMTVTSLGVDVQMHFLFESTLQL-----VENQTFENYFPPLQVIYAL 396  
N.crassaChs2 TRALLAGMGVYQEGIAKQQVNGKDVTAHIEYTTQVGMTIKNDVVQLIPKQQPVQMLFCL 337  
S.cerevisiaeChs2 SLDYLAALGVYQEDMAKASVNGDPVKAHIFELTQV--SINADLDYVSKDIVPVQLVFCL 410  
\* : \* : \* : . \* \* \* : : \* : . . \* : : \* :

c

S.monoicaChs1 KEHNAGKLDShLWYFDAFAEQVMPDYTVLIDVGT MPTKSSFYKLLTALEINAQIGGVCGE 413  
S.monoicaChs2 KENNGGKLNShLWFFNAFSEQLNPKYTVLIDVGT IPAETS VFRLIRSMERNYQIGGVAGE 456  
N.crassaChs2 KEKNQKKINShRWFQAFGRVLDPNICVLIDAGTKPGGSSIIHLWKAFDLEPMCAGACGE 397  
S.cerevisiaeChs2 KEENKKKINShRWLFNAFCPVLQPTVVTLIDVGT RLNNTAIYRLWKVFDMDSNVAGAAGQ 470  
\*\*.\* \* : : \*\* \* \* : : \* . \* : \* : : : \* : : : \* : : : \* : : :

d

e

S.monoicaChs1 IAVDKPL--PNMCNWVIAAQHFEYKISNILDKSLESFCGFISVLPGAFSA YRYKAIRG-- 469  
S.monoicaChs2 IAVEA---PNYFNPVIAAQHFEYKISNIMDKSLESVFGFISVLPGAFSA YRYEAIRAVK 512  
N.crassaChs2 IKAMLGTGGKNLINPLVATQNFYKMSNILDKPLESAFGFISVLPGAFSA YRYVALQNDK 457  
S.cerevisiaeChs2 IKTMKGKWLKLFNPLVASQNFYKISNILDKPLESVFGYISVLPGALSAYRYRALKNHE 530  
\* . : \* : : \* : \* : \* : \* : \* : \* : \* : \* : \* : \* : \* : \* : \* : \* : \* : :

f

S.monoicaChs1 ---APLQAYFKSLTTPMaelGPFAGNMYLAEDRILCFELLARKDCNWTMHYVKDAIARTD 526  
 S.monoicaChs2 -GVGPLPEYFKSLTSTTKELGPFQGNMYLAEDRILCFELLARKHKQWTMHYVKDAIARTD 571  
 N.crassaChs2 NGQGPLEKYFAGEKLGHDGAGIFTANMYLAEDRILCFELVTKRNCHWILQYVKSATGETD 517  
 S.cerevisiaeChs2 DGTGFLRSYFLGETQEGRDHDFVTANMYLAEDRILCWELVAKRDAKWVLKYVKEATGETD 590  
 .\*\* \*\* . . : . \* .\*\*\*\*\*:\*\*\*\*\*: \* :\*\*\*. \* .\*\*

g

S.monoicaChs1 VPTNLIDLVGQRRRWLNGSFFATLFAIWNWGRVYTESNHSFTRKMALLVQYVYNVLQVIF 586  
 S.monoicaChs2 VPETLVDLIKQRRRWLNGSFFAGLFAIGHFGRVWSQSSHTMSRKLVTFTQFFYLALQNLL 631  
 N.crassaChs2 VPADLTELIQRRRWLNGSFFAAIYAIVHFHQFFR-SDHSFLRKIAFFIEFVQTVNMIF 576  
 S.cerevisiaeChs2 VPEDVSEFISQRRRWLNGAMFAAIYAQLHFYQIWK-TKHSVVRKFFLHVEFLYQFIQMLF 649  
 \*\* : ::: \*\*\*\*\*:\*\*\* :\* : : : :\*. \* : : : : : : :

S.monoicaChs1 SWFLPANFYALALYFVIFQGFKDNRWNFIDTSKYPALLLDGLPTAFNVFYAVTVFTQVTIG 646  
 S.monoicaChs2 SWFLLSNLFLTIFYFVLTLAFTDS-----APALLQAMLT-----LYLAIVGGLIVFA 677  
 N.crassaChs2 AWFAIGNFFLVFKILTTLGLGDEK-----LLGTVGQILGVVFAWAYGVTLITCFVLS 627  
 S.cerevisiaeChs2 SWFSIANFVLTIFYLAGSMN-----LVIKHGEALFIFFKYLIFCDLASLFIIS 697  
 :\*\* .\*: \*: : : \*

S.monoicaChs1 LGNKPKHVKGTHYLISVLFG-ILMLIASTIAIVFV----TAHKTVEAILAV----- 694  
 S.monoicaChs2 LGNKPEPRTASFYLFSCLYMGIIMMLVTGISIYGLVGKGTSAVKDPRVITGALGNCTVSE 737  
 N.crassaChs2 MGNRPAGSPRLYMGMVVFWAIIIFYLMFAAIYIAVVA---IQTDVQKGLSFTDLFRNELF 684  
 S.cerevisiaeChs2 MGNRPQGAHLFITSMVILSICATYSLICGFVFAFKS---LASGTES-----HKIF 745  
 :\*\*:\* . :

h

S.monoicaChs1 -----LILGTTFFIGSAMHCEVHHIVLTFVQYTALMPSFVNILMVYSFCNLHDISWGT 746  
 S.monoicaChs2 GELVGGVVTSLGLIFLSAFVHGEFS-ILLSVIQYFFMLPTFVNVLGIYAYSNLHDISWGT 796  
 N.crassaChs2 YTLIVSVVSTYGIWLIASLLMFPDWHMVTSMVQYMLLSPTYTNVLNVYAFCNTHDISWGT 744  
 S.cerevisiaeChs2 VDIVISLLSTYGLYFFSSLMYLDPDWHMFTSSIQYFLTLPACTCTQLIFAFCNTHDVSWGT 805  
 \* : : : : : : : : \* \* : : : \* \* : : : \*

S.monoicaChs1 KGIDTGHEHK-SDGAVGQYKD-----IVARQKALEAKKAEDARNQDEL 788  
 S.monoicaChs2 KGLESGGGHGPTKTGGGNVKD-----VVEQQKKLEAQRQAAAKEKEDV 839  
 N.crassaChs2 KGDDKPKDKLPSVNTKDGQGKTDLDEGDLNASYERELQVFSRKYVKPVTAPTSAQLEEKQ 804  
 S.cerevisiaeChs2 KGSTQESKQLSKAIVVQGPDGKQIVETDWPQEVDDKKFLEIKSRLKEPEFEESGNEKQSK 865  
 \*\* . : .. : :

S.monoicaChs1 KKRFDSFRSNLLLIWVMSNMAMVVICVNTIGAD-----SYLPFLYAF 830  
 S.monoicaChs2 DNSFRAFRSTLLLSWLTNGIWLTVVTDYMSSG-----CYLKGLSFV 881  
 N.crassaChs2 MDYYRGVRSMLVWVWMITNFALCAVVLSTAGLERIDPEEGSQEQQTTKRATIYMSVVLWS 864  
 S.cerevisiaeChs2 NDYYRDIRTRIVMWMLSNLILIMSIIQVFTPDQTDNG-----YLIFILWS 911  
 . : .\*: : : \* : \*

S.monoicaChs1 VAAFNGIRLLGCIGYLLY--YARQFLLFNLTLSATGVLHKRHEARKHKKAEDDPDIDFEM 888  
 S.monoicaChs2 VGFFNVIRFTGCVVFIILRIFRRFGLNCCAMGATHDITYERNLPPDWQTHYNVQNQADGRV 941  
 N.crassaChs2 VAVLSGFKFVGACWFLVVRMFRGV----- 888  
 S.cerevisiaeChs2 VAALAAFRVVGSMAFLFMKYLRIIVSYRNKVEGSGSWEVSKLDLPNVFHKKG----- 963  
 \*. : : : \* . : :

S.monoicaChs1 GTFQNDLPDVAVPIQAPYNRMR 910  
 S.monoicaChs2 VVARAESINPATTPRGGAYQQV- 962  
 N.crassaChs2 -----  
 S.cerevisiaeChs2 -----
